# Supplementary material for: Understanding the evolutionary structural variability and target specificity of tick salivary Kunitz peptides using next generation transcriptome data
Source: PubMed Central journal article supplement (PMC3890586; doi:10.1186/1471-2148-14-4), 2014-01-07

A

Prostriata clade:  
 G2, G4, G5, G8, G9, G10, G11  
 Ion channel blockers/modulators

Prostriata/Metastriata/  
 Argasidae clade:  
 G1, G7

Prostriata/  
 Metastriata  
 clades:  
 G1  
 Serine protease  
 inhibitors

Prostriata/Argasidae  
 clade:  
 G3  
 Anti-clotting  
 inhibitors

Argasidae clade:  
 Anti-platelet  
 inhibitors

Prostriata clade:  
 G6

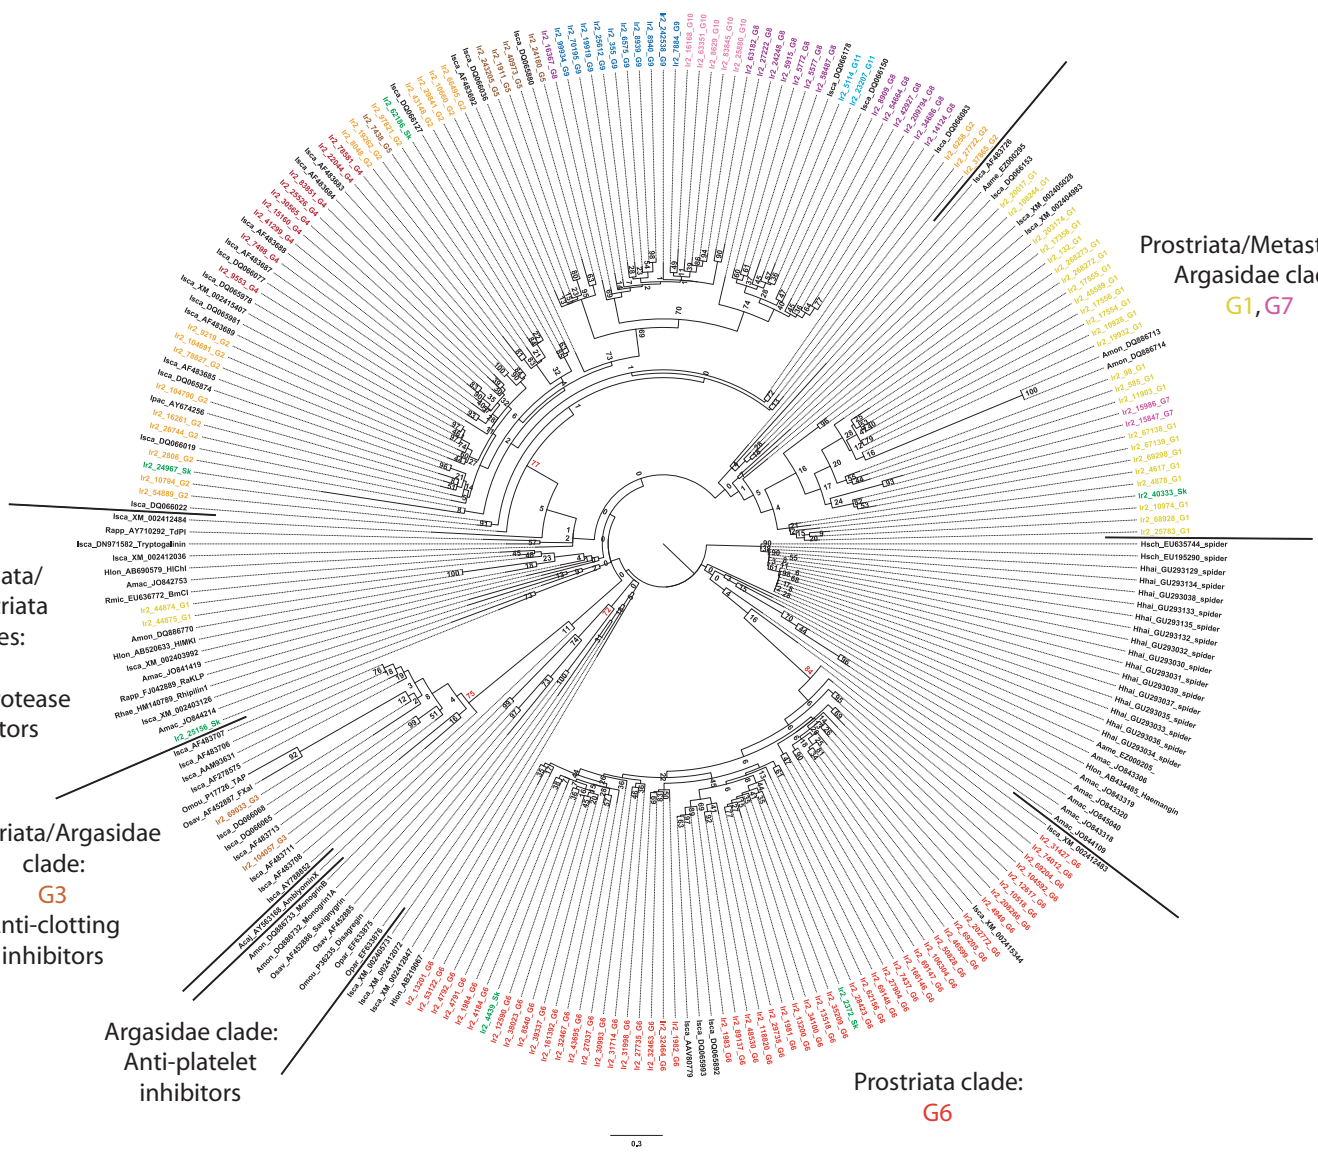

B

Prostriata clade:  
G2, G4, G5, G8, G9, G10, G11  
Ion channel blockers/modulators

Argasidae clade:  
Anti-platelet  
inhibitors

Prostriata clade:  
G6  
Serine protease inhibitors

Prostriata/Argasidae  
clade:  
G3  
Anti-clotting inhibitors

Prostriata/Metastricata  
clade:  
G1, G7  
Serine protease inhibitors

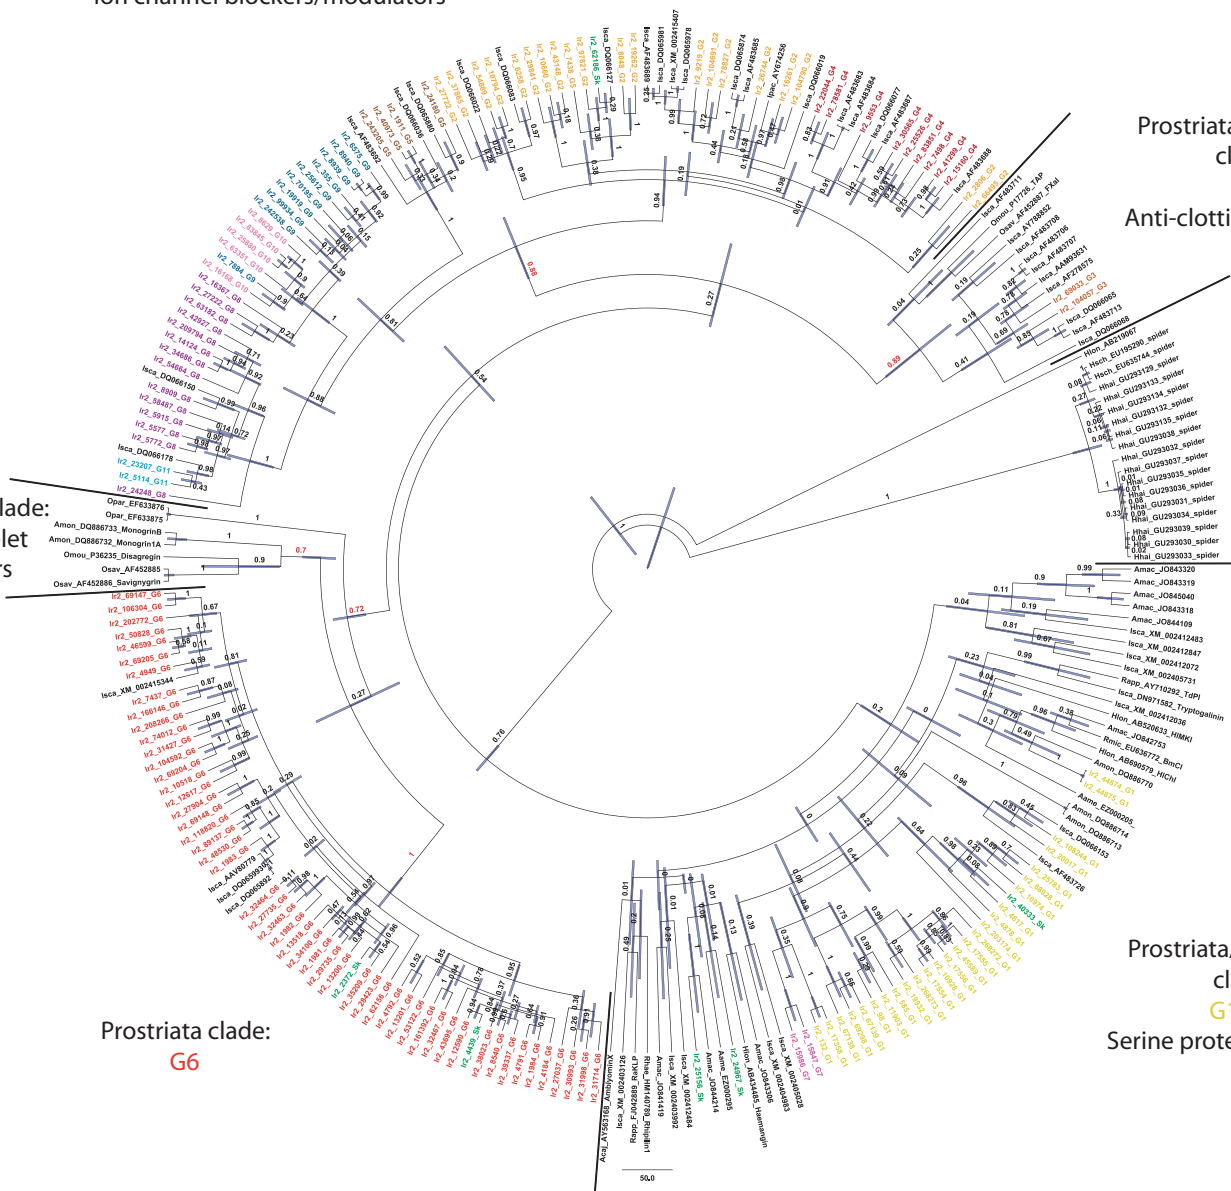

Supplement: 1471-2148-14-4-S4.pdf [file 1471-2148-14-4-S4.pdf]
